# Supplementary material for: Bubble-chip analysis of human origin distributions demonstrates on a genomic scale significant clustering into zones and significant association with transcription
Source: HighWire-hosted journal article supplement (doi:10.1101/gr.111328.110), 2010-12-20
Supplement: SUPPLEMENTARY_METHODS.pdf [file SUPPLEMENTARY_METHODS.pdf]

## SUPPLEMENTARY METHODS

*Microarray analysis supporting data in Fig. 2, Fig. 3, and Fig. S1.* We produce a normalized, smoothed signal or  $\log_2$  ratio of treatment (origin libraries) over control (genomic DNA) as a function of the genomic coordinate in the following way. We first apply the quantile normalization procedure to replicate arrays, which essentially ensures that the intensity distributions are the same. Treatment and control array intensities are then scaled so that their median value across the array is the same. We then apply a smoothing procedure whereby we calculate a median-like value (i.e., Hodges-Lehmann estimator) for the  $\log_2$  ratios of treatment over control probes that fall within a 1 kb window that we slide across ENCODE regions. More specifically, after normalization, the two-sample Wilcoxon Rank Sum test was then applied to all replicate  $\log_2(\max(\text{PM-MM}, 1))$  treatment and control values that fell within a 1 kb sliding window (Cawley et al. 2004) to arrive at a Hodges-Lehmann estimator (Hollander and Wolf 1999) of the  $\log_2$  ratios of cloned origin fragments over genomic control DNA (i.e., signal) for every probe position on the array. We chose a window size of 1 kb, which is ~three-fold smaller than the typical EcoRI fragment in the ENCODE regions (median and mean lengths are 2,645 bp and 3,851 bp, respectively) and considerably smaller than the average trapped fragment (~6.5 kb). This relatively modest window size minimizes the smoothing of probe intensities across two adjacent EcoRI fragments, but encompasses up to ~45 probes within the window for estimating enrichments over control DNA. We then calculated the median of the Hodges-Lehmann estimator of the  $\log_2$  ratio of origin library over control DNA within every EcoRI fragment to arrive at the medRI values. We applied a medRI cutoff of 0.2 (see Fig. S1 and S2) and required that at least eight positive probes (i.e., signal greater than 0) for an EcoRI fragment be called positive (bubble-containing).

*Calculation of the False Discovery Rate (supporting values in the main text and Figure S1C).* We estimated the False Discovery Rate (FDR) corresponding to the  $\log_2$  medRI cutoff value of 0.2 for early-HeLa, log-HeLa, and log-GM06990. We randomly permuted the signals of the probes, recalculated the medRI value for the randomized data, and applied a 0.2 cutoff to estimate the number of false positives. This calculation was performed 100 times and generated the distribution of false positives shown in Figure S1C. The FDR was estimated by calculating the mean number of false positives from

the 100 random permutations of probe-signal data and dividing by the number of actual positive calls for early-HeLa, log-HeLa, and log-GM06990. We found 2.27, 4.25, and 14.74 mean false positives for early S-phase HeLa, log-phase HeLa, and log-phase GM06990, which correspond to FDRs of 0.4%, 0.6% and 1.5%, respectively.

*Complete and Restricted Null Models.* We used random permutation models to assess the statistical significance of origin clustering, as well as the association between origin fragments and functional elements, including transcribed genes and histone marks. With cluster analysis, *all* of the EcoRI fragments (isolated and zonal as well as non-bubble-containing) were randomly permuted or shuffled 10,000 times within each ENCODE region. This procedure generated 10,000 instances of randomly permuted EcoRI fragments. We note that this random permutation procedure separated zonal fragments and mixed them together with origin-negative, isolated, and zonal fragments from other zones. However, this approach preserves the number and genomic coverage of bubble-containing fragments within each ENCODE region. We refer to this as the *complete* null model, which allows an assessment of the significance of associations between genes and distinct fragment classes within any given zone category (as in Table IB-E).

However, as discussed, the number of zones and the average number of fragments within zones are over-represented in the experimental or actual data relative to the complete null data, which could lead to over-estimates of the significance of associations between zones, their fragments, and active genes. Therefore, a *restricted* null model also was generated in which isolated fragments, origin-negative fragments, and *zones treated as units* were randomly permuted 10,000 times within their ENCODE regions (Table IF&G). This procedure generated 10,000 instances of randomly permuted zones and EcoRI fragments. Thus, zonal fragments are kept together and not separated in the restricted null model. As in the complete null model, the number and genomic coverage of the bubble-containing fragments is preserved within every ENCODE region. This allowed us to assess the significance of the association between zones and active genes, keeping the number and size of zones the same in the restricted random data and the actual data.

*Cluster analysis supporting Fig. 4 and Table SII.* Two or more adjacent bubble-containing EcoRI fragments were classified as a cluster or zone. All other bubble-containing fragments were classified as isolated. Because each bubble-containing EcoRI fragment contains at least one initiation site, two or more contiguous bubble-containing EcoRI fragments indicate independent, neighboring origin firing events, which we define as a cluster or zone of initiation. Using the random permutation null model, we find that the number of zones, the mean number of fragments in zones, and the total number of fragments in zones are highly significant (Table SII).

*Origin-gene interaction analysis supporting Fig. 5 and Table I.* We used RefSeq annotations (Pruitt et al. 2007) to compare origin activity and gene sequences. We also used Affymetrix transcriptome data to determine which genes were expressed in log-phase HeLa and GM06990 cells. Specifically, the sites of transcription were down-loaded and overlapped with RefSeq exons. When the fraction of each RefSeq gene that overlapped the sites of transcription was calculated, a bimodal distribution of unexpressed and expressed genes was observed, with a dip near 0.5. Thus, for a gene to be classified as transcribed, we required that 60% or more of a RefSeq gene's UTRs and exons overlap sites of transcription.

For the purpose of significance testing, origin fragments or zones treated as units that *completely overlapped* transcribed regions of the genome (class or category 1; Fig. 5A) were classified as transcribed. Origin fragments or zones treated as units that completely or partially overlapped *non-transcribed regions* (classes or categories 5-9; Fig. 5A) were classified simply as non-transcribed.

An important question in the replication field is whether transcription and origin firing can occur on the same DNA template simultaneously. Given that a large number of bubble-containing fragments *partially* overlap transcribed loci, we arrived at a classification scheme that assessed the likelihood that an origin could have fired in a transcribed region of the fragment. Thus, we took into account whether a fragment contained a transcription-free region large enough to accommodate an origin recognition complex (ORC). Additionally, the trapping method likely captured only those bubble-containing fragments in which the start site was beyond a certain distance from the edges of the EcoRI fragment.

Thus, we arrived at a minimum distance from the edge of EcoRI fragments in which an origin could have fired and been detected, and included this distance in our classification procedure as detailed below.

Origin fragments or zones treated as units that *partially overlapped* transcribed regions (classes or categories 2, 3, and 4; Fig. 5A) are necessarily ambiguous. Therefore, they were designated as transcribed, not transcribed, or indeterminate in the following way: each fragment was divided into *segments* with different transcription states. For assessing possible concurrence of initiation of replication and transcription, we assumed a liberal 500 bp footprint by the origin recognition complex *in vivo* (ORC; Diffley and Cocker 1992). Also, since we found few bubble-containing fragments below ~200 bp, we assumed that origins had to fire > 100 bp from the edges of the EcoRI fragment in order to be trapped and therefore *detectable*. Of course, the entire 500 bp ORC footprint does not have to be completely contained within the fragment.

If an origin could have fired in a detectable region of the fragment or zone that was transcribed ( $\geq 1$  bp overlap), then we labeled that segment of the fragment or zone as transcribed (T). If an origin could have fired in a detectable region that was free of transcription, that segment was annotated as not transcribed (NT), provided that there was a 500 bp transcription-free window that overlapped the detectable regions of the bubble-containing fragment or zone. If a fragment or zone contained T but no NT segments, then it was classified as transcribed. If a fragment or zone contained NT and no T segments, it was classified as not transcribed. If a fragment or zone contained both T and NT segments, then it was classified as indeterminate. As an example, if a bubble fragment completely contains a transcribed gene near its center, and there is a  $\geq 500$  bp transcription-free region upstream or downstream, it was classified as indeterminate.

When assessing the fraction of RefSeq genes that overlapped origins, we represented overlapping genes (including alternative isoforms) by the group's minimum and maximum coordinates. If a gene within the group of overlapping genes was classified as active, then the group was classified as active.

*Histone marks unique to origins (supporting discussion in main text and Table SIV).* We assessed the significance of the association between bubble-containing fragments and each activating histone mark that was mapped to ENCODE regions in HeLa and GM06990 by performing chi-squared

tests of independence. Specifically, we built 2x2 contingency tables of counts of EcoRI fragments that were and were not bubble-containing (rows) and whose center was or was not within 7.5 kb of a given active histone mark (columns). We calculated the chi-squared statistic and associated p-values using the statistical software environment R (<http://www.r-project.org/>).

To distinguish the association of histone marks and origin activity from histone marks near or in promoters, isolated fragments and zones were categorized into ten mutually exclusive classes. Isolated fragments or zones that overlap transcribed or non-transcribed genes with ( $H_p^*$ ) or without ( $H_p^0$ ) an activating histone mark within  $\pm 2$  kb of the transcription start site were put into categories 1-4. Isolated fragments or zones that *did not overlap* a gene were placed in the remaining six categories. If the center of an isolated fragment or a zonal end-fragment was within 7.5 kb of the 5' or 3' end of a gene, the isolated fragment or zone was placed in one of categories 5-8. If an activating histone mark was within 7.5 kb from a category 5-8 isolated fragment center or zonal end-fragment center, the isolated fragment or zone was put into category 5 (5' -  $H^*$ ) or 7 (3' -  $H^*$ ); if an activating histone mark was *not within 7.5 kb* of a category 5-8 isolated fragment or zonal end-fragment center, the isolated fragment or zone was put into category 6 (5' -  $H^0$ ) or 8 (3' -  $H^0$ ). Isolated fragments or zonal end-fragments whose centers were  $>7.5$  kb from a gene were classified as intergenic. Intergenic isolated fragments or zonal end-fragments whose centers were within 7.5 kb of an activating histone mark were put into category 9 (intergenic -  $H^*$ ); otherwise, they were put into category 10 (intergenic -  $H^0$ ).

Given the strong association between origins/zones and transcribed genes, we further assessed the extent to which origin activity within genes was associated with activating histone marks that were not located within the promoters themselves. Thus, isolated origin fragments or zones that overlapped genes were also placed in categories 11-14. If the center of a genic fragment or zonal end-fragment was not within 7.5 kb of an activating histone mark, the fragment or zone was put into category 11 (in-gene -  $H^0$ ). Genic histone-associated isolated fragments or zones that were within genes that either did not or did contain an activating histone mark within  $\pm 2$  kb of that gene's transcription start site were placed in categories 12 (in-gene -  $H^*$  but no  $H_p^*$ ) and 13 (in-gene -  $H^*$  and  $H_p^*$ ), respectively. Finally, genic histone-associated isolated fragments or zones that were within non-transcribed genes were put into

category 14 (in-gene – H\* & non-Tx). For simplicity, we annotated zones as units and did not annotate their fragments separately. Graphic representations of the fourteen annotation classes discussed above are available from J.L.H. upon request ([jlh2d@virginia.edu](mailto:jlh2d@virginia.edu)).

We again assessed the significance of the overlaps/associations of isolated fragments and zones with the 14 annotation classes listed above using our complete (data not shown) and restricted null random models. Based on both models, zones were significantly associated with transcribed genes that contained activating marks in their promoters (75 zones) and those that did not (5 zones) in HeLa cells, while in GM06990 cells, only the overlap with transcribed genes that contained activating marks in their promoters was significant (55 zones). In HeLa cells, there was significant over-representation of isolated fragments with genic loci that contain an activating mark in the promoter of either transcribed genes (p-value  $< 10^{-4}$ ) or silent genes (p-value=0.0065), based on the restricted null model only. Interestingly, the intergenic regions in HeLa and GM06990 cells contained 830 and 1,040 activating mark loci, yet zones were not significantly associated with these. In GM06990 cells, there is a mildly significant association between isolated fragments and activating marks located in intergenic regions based on the restricted null model (p-value 0.034). These results suggest that origins, and zones in particular, are strongly associated with activating chromatin marks at the 5' ends of transcribed genes, but are not overrepresented near activating marks outside of promoters.

## SUPPLEMENTARY REFERENCE

Hollander, M., and Wolf, D.A. (1999). Nonparametric Statistical Methods (2<sup>nd</sup> Edition, John Wiley and Sons).

## SUPPLEMENTARY TABLE LEGENDS

***Table SI. Mean size and signal strength of overlapping & non-overlapping fragment signals in microarray comparisons.*** A. Comparison between signals from two different early S-phase HeLa hybridization replicates. B. Comparison between signals from two log-phase HeLa biological replicates. C. Comparison between signals from early S-phase and log-phase HeLa libraries. D. Comparison between signals from log-phase HeLa and log-phase GM06990 libraries. The column labeled *# Signals* is the number of medRI signals above the 0.2 cutoff in the ENCODE regions. *Sample percentages* are

calculated by dividing the number of overlapping fragments by the number of positive fragments in that sample. *mean size* refers to mean bubble-containing fragment size, while *mean strength* refers to the mean signal strength of bubble-containing fragments.

**Table SII. Significance of fragment clustering.** Assessment of the significance of the clustering of bubble-containing fragments into zones for early-HeLa, log-HeLa and log-GM06990. A cluster or zone is defined as two or more contiguous bubble-containing fragments that pass the 0.2 medRI cutoff. Statistics were calculated using the complete null model in which EcoRI fragments were randomly permuted within each ENCODE region 10,000 times. P-values were calculated by comparing the number of experimentally observed or actual # of clusters to those found in the random data; # actual is the number of experimentally observed clusters in the data, fold-change is the # actual divided by the mean random number of clusters; mean random is calculated by taking the mean of the number of clusters found in the 10,000 random permutations of EcoRI fragments; sd random is the standard deviation of the number of clusters found in the 10,000 random permutations of EcoRI fragments; and z is the z-score  $[(\# \text{ actual} - \text{mean random})/(\text{sd random})]$ , which is the number of standard deviations of the random data that divide the # actual and mean random values.

**Table SIII. Significance of origin-gene interactions.** Assessment of the significance of the overlap between transcribed (tx), non-transcribed (non-tx) genes, intergenic loci, and isolated and zonal bubble-containing fragments for log-HeLa and log-GM06990. Isolated fragments, zones, and fragments within zones were classified according to the definitions shown within panel A1 of Table I and Fig. 5B2. For sub-tables A1-B2, statistics were calculated using the complete null model in which EcoRI fragments were randomly permuted within each ENCODE region 10,000 times. For sub-tables C1 and C2, statistics were calculated using the restricted null model in which EcoRI fragments, isolated bubble-containing fragments, and zones treated as units were randomly permuted within each ENCODE region 10,000 times. P-values were calculated by comparing the number of experimentally observed or actual # of clusters to those found in the random data; # actual is the number of experimentally observed clusters in the data; fold-change is the # actual divided by the mean random number of clusters; mean random is calculated by taking the mean of the number of clusters found in the 10,000 random permutations of

EcoRI fragments; sd random is the standard deviation of the number of clusters found in the 10,000 random permutations of EcoRI fragments; and z is the z-score  $[(\# \text{ actual} - \text{mean random})/(\text{sd random})]$ , which is the number of standard deviations of the random data that divide the # actual and mean random values.

**Table SIV. Isolated & Zones – Randomization for histone marks.** Assessment of the significance of the overlap between activating histone marks, transcribed (tx) genes, non-transcribed (non-tx) genes, intergenic loci and isolated and zonal bubble-containing fragments for log-HeLa and log-GM06990. Below, we provide a key that specifies the meaning of the 14 annotation categories involving activating histone marks, transcribed (tx) genes, non-transcribed (non-tx) genes, and intergenic loci. Statistics were calculated using the complete null model where EcoRI fragments were randomly permuted within each ENCODE region 10,000 times. P-values were calculated by comparing the number of experimentally observed or actual # of clusters to those found in the random data; # actual is the number of experimentally observed clusters in the data; fold-change is the # actual divided by the mean random number of clusters; mean random is calculated by taking the mean of the number of clusters found in the 10,000 random permutations of EcoRI fragments; sd random is the standard deviation of the number of clusters found in the 10,000 random permutations of EcoRI fragments; and z is the z-score  $[(\# \text{ actual} - \text{mean random})/(\text{sd random})]$ , which is the number of standard deviations of the random data that divide the # actual and mean random values.



|    | Notations used in Table SIV           | Key                                                                                                                                                                                                                                                                                                                                                                         |
|----|---------------------------------------|-----------------------------------------------------------------------------------------------------------------------------------------------------------------------------------------------------------------------------------------------------------------------------------------------------------------------------------------------------------------------------|
| 1  | +/-2 kb TSS – Hp*/Tx                  | Fragment (isolated/zone) overlaps a transcribed gene by $\geq 1$ bp with an activating histone mark within +/-2kb of the TSS                                                                                                                                                                                                                                                |
| 2  | +/-2 kb TSS – Hp <sup>o</sup> /Tx     | Fragment (isolated/zone) overlaps a transcribed gene by $\geq 1$ bp <i>without</i> an activating histone mark within +/-2kb of the TSS                                                                                                                                                                                                                                      |
| 3  | +/-2 kb TSS – Hp*/non-Tx              | Fragment (isolated/zone) overlaps a non-transcribed gene by $\geq 1$ bp with an activating histone mark within +/-2kb of the TSS                                                                                                                                                                                                                                            |
| 4  | +/-2 kb TSS – Hp <sup>o</sup> /non-Tx | Fragment (isolated/zone) overlaps a non-transcribed gene by $\geq 1$ bp <i>without</i> an activating histone mark within +/-2kb of the TSS                                                                                                                                                                                                                                  |
| 5  | 5' – H*                               | Center of isolated fragment or zonal end-fragment is within 7.5kb (upstream) of the 5' end of a gene & (an activating histone mark is within 7.5 kb of the isolated fragment center/zonal end fragment centers (or) an activating histone mark overlaps with isolated/zonal fragments by $\geq 1$ bp)                                                                       |
| 6  | 5' – H <sup>o</sup>                   | Center of isolated fragment or zonal end-fragment is within 7.5kb (upstream) of the 5' end of a gene & (an activating histone mark is <i>not</i> within 7.5 kb of the isolated fragment center/zonal end fragment centers (and) an activating histone mark does <i>not</i> overlap with isolated/zonal fragments)                                                           |
| 7  | 3' – H*                               | Center of isolated fragment or zonal end-fragment is within 7.5kb (downstream) of the 3' end of a gene & (an activating histone mark is within 7.5 kb of the isolated fragment center/zonal end fragment centers (or) an activating histone mark overlaps with isolated/zonal fragments by $\geq 1$ bp)                                                                     |
| 8  | 3' – H <sup>o</sup>                   | Center of isolated fragment or zonal end-fragment is within 7.5kb (downstream) of the 3' end of a gene & (an activating histone mark is <i>not</i> within 7.5 kb of the isolated fragment center/zonal end fragment centers (and) an activating histone mark does <i>not</i> overlap with isolated/zonal fragments)                                                         |
| 9  | Intergenic – H*                       | Center of isolated fragment or zonal end-fragment is $\geq 7.5$ kb from a gene & (an activating histone mark is within 7.5 kb of the isolated fragment center/zonal end fragment centers (or) an activating histone mark overlaps with isolated/zonal fragments by $\geq 1$ bp)                                                                                             |
| 10 | Intergenic – H <sup>o</sup>           | Center of isolated fragment or zonal end-fragment is $\geq 7.5$ kb from a gene & (an activating histone mark is <i>not</i> within 7.5 kb of the isolated fragment center/zonal end fragment centers (and) an activating histone mark does <i>not</i> overlap isolated/zonal fragments)                                                                                      |
| 11 | In gene - H <sup>o</sup>              | Fragment (isolated/zone) overlaps a gene by $\geq 1$ bp & (an activating histone mark is <i>not</i> within 7.5 kb of the isolated fragment center/zonal end fragment centers (and) an activating histone mark does <i>not</i> overlap with isolated/zonal fragments)                                                                                                        |
| 12 | In gene – H* but no Hp*               | Fragment (isolated/zone) overlaps a gene by $\geq 1$ bp & (an activating histone mark is within 7.5 kb of the isolated fragment center/zonal end fragment centers (or) an activating histone mark overlaps with isolated/zonal fragments by $\geq 1$ bp) and the isolated fragment/zone does <i>not</i> contain an activating histone mark within +/-2kb of that gene's TSS |
| 13 | In gene – H* and Hp*                  | Fragment (isolated/zone) overlaps a gene by $\geq 1$ bp & (an activating histone mark is within 7.5 kb of the isolated fragment center/zonal end fragment centers (or) an activating histone mark overlaps with isolated/zonal fragments by $\geq 1$ bp) and the isolated fragment/zone contains an activating histone mark within +/-2kb of the TSS                        |
| 14 | In gene – H* & non-Tx                 | Fragment (isolated/zone) overlaps a <i>non</i> -transcribed gene by $\geq 1$ bp & (an activating histone mark is within 7.5 kb of the isolated fragment center/zonal end fragment centers (or) activating histone mark overlaps isolated/zonal fragments by $\geq 1$ bp)                                                                                                    |

**Table SV. Locations of the ten overlaps among Study 1 (Prioleau) and Study 2 (Dutta) HeLa nascent strand (NS) calls and bubble-containing fragment signals.** The locations of the bubble-containing fragments are indicated under the *Signal* column, and their positions relative to local genes (Refseqs) are tabulated under *Genes*. As shown under the *Remarks* column, only two of the ten are completely intergenic; the remaining eight overlap one or more genes, six of which are transcribed.

### SUPPLEMENTARY FIGURE LEGENDS

**Figure S1. MedRI distributions, qq plots, and false discovery rates (supporting Fig. 2&3).**

Panel A. Distribution plots (i.e., density or normalized counts on the y-axis) of all medRI values (x-axis) from early-S-phase HeLa, log-phase HeLa, and log-phase GM06990 data. All of these plots display a near normal noise distribution about the mode, which is negative in all cases. Panel B. Quantile-quantile plots of the medRI quantiles (y-axis) compared to that of a standard normal distribution (x-axis) from early-S-phase HeLa, log-phase HeLa, and log-phase GM06990 data. These plots confirm a normal noise core in the medRI distributions, with a sharp departure and heavy right signal tail starting at small positive medRI values. Panel C. Distribution plots (i.e., density or normalized counts on the y-axis) of the number of false positives (x-axis) derived by randomly permuting array probe signals, recalculating medRI values, and applying a 0.2 cutoff.

**Figure S2. Probe signal values in EcoRI fragments that just pass the 0.2 medRI cutoff.**

Integrated Genome Browser screen shots of EcoRI fragments whose medRI value is slightly above the 0.2 cutoff. EcoRI fragment boundaries are shown in green and the probe signals are shown in blue. We selected isolated bubble-containing fragments to highlight the fact that positive signal values tend to persist along the central bubble-containing fragment, while the signal values are near zero or negative in the flanking EcoRI fragments. Thus, the positive signal in the bubble-containing fragment and the corresponding positive call are not the result of smoothing positive signal from neighboring EcoRI fragments. Rather, the signal distribution is precisely what would be expected of relatively low copy number cloned bubble-containing fragments that hybridized to the arrays.

**Figure S3. Correlations between hybridization or biological replicates are good, while early-S-phase/log-phase and HeLa/GM06990 comparisons are not (supporting Fig. 3).** Scatter plots of the following data sets: A) two independent hybridizations with the early-S-phase HeLa origin library; B) the two log-phase HeLa biological replicates; C) early-S-phase- versus log-phase HeLa libraries; and D) log-phase HeLa versus log-phase GM06990 libraries. Pearson correlation coefficients are shown in each panel.

**Figure S4. Distance distributions between origin-mark centers (supporting discussion of origin distributions vis-à-vis selected histone marks).** Panels A and B. Distribution plots of distances between the center of bubble-containing fragments and activating histone mark sites in log-phase HeLa and GM06990 cells. For reference, also plotted are the center-to-edge distances of bubble-containing fragments. Note that a relatively large percentage of the activating marks overlap bubble-containing fragments and that these distance distributions begin to fall off their peak values at ~7.5kb, which is the distance cutoff used for associating a bubble-containing fragment to an activating histone mark. Panel C. Distribution plots of distances between the center of bubble-containing fragments and repressive histone marks. Here, the distances are much greater than the characteristic half-size of the bubble-containing fragments, indicating that repressive marks tend to be distant from origins.

Figure S1

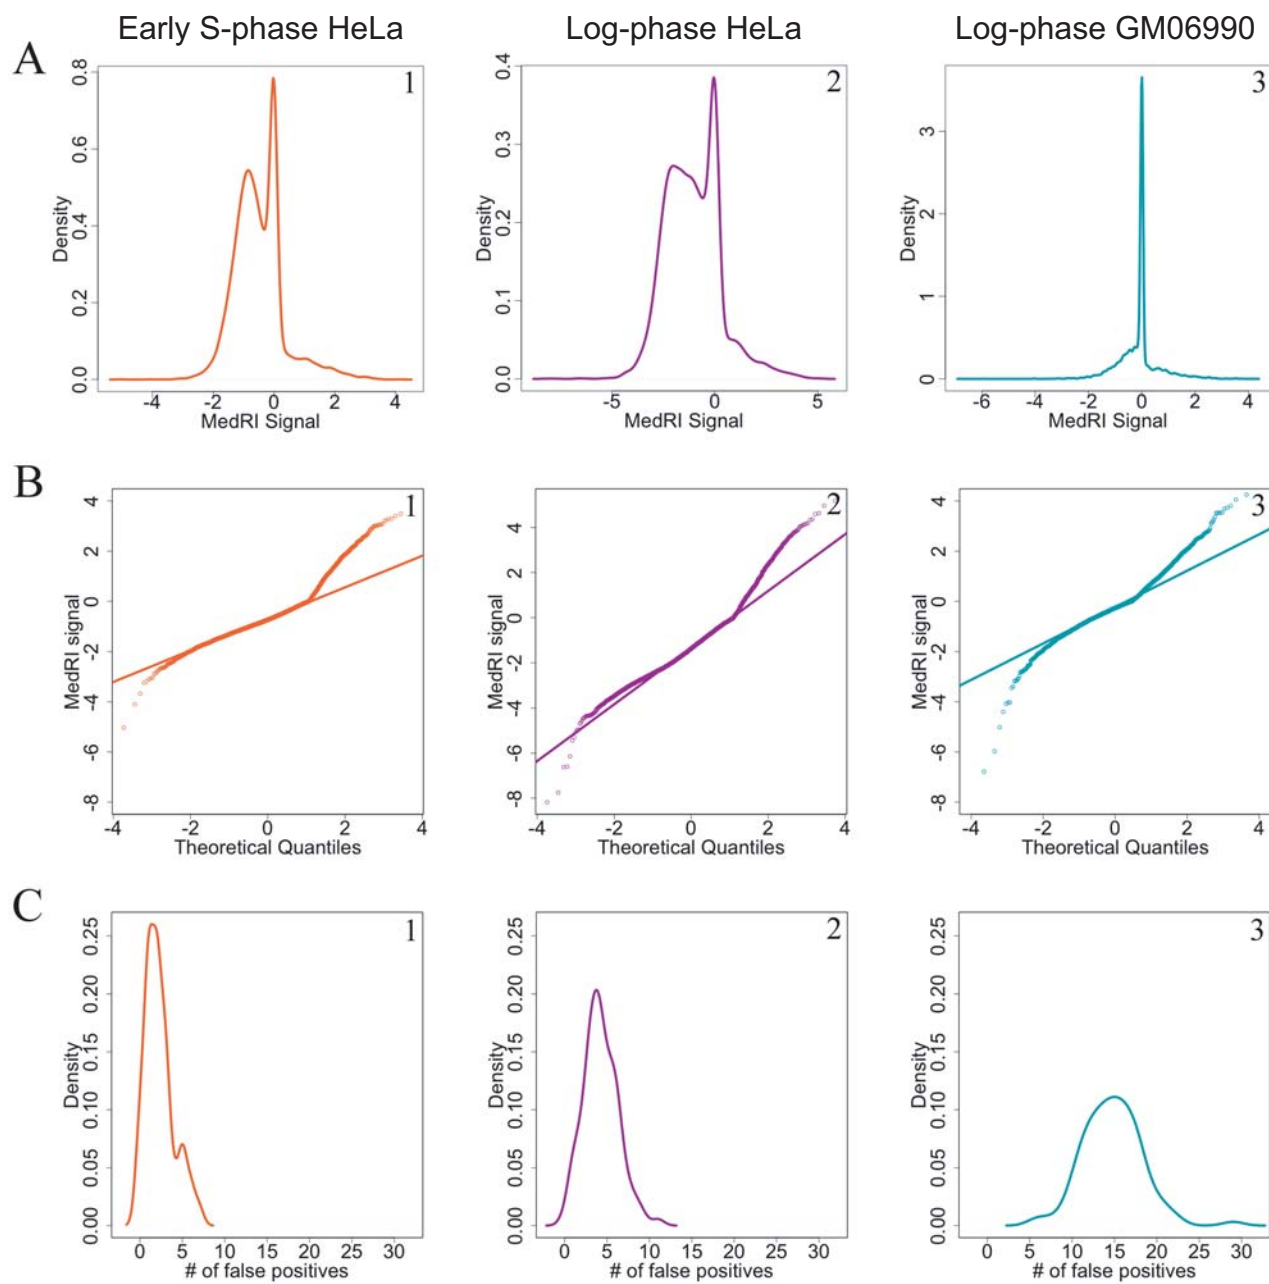

Figure S2

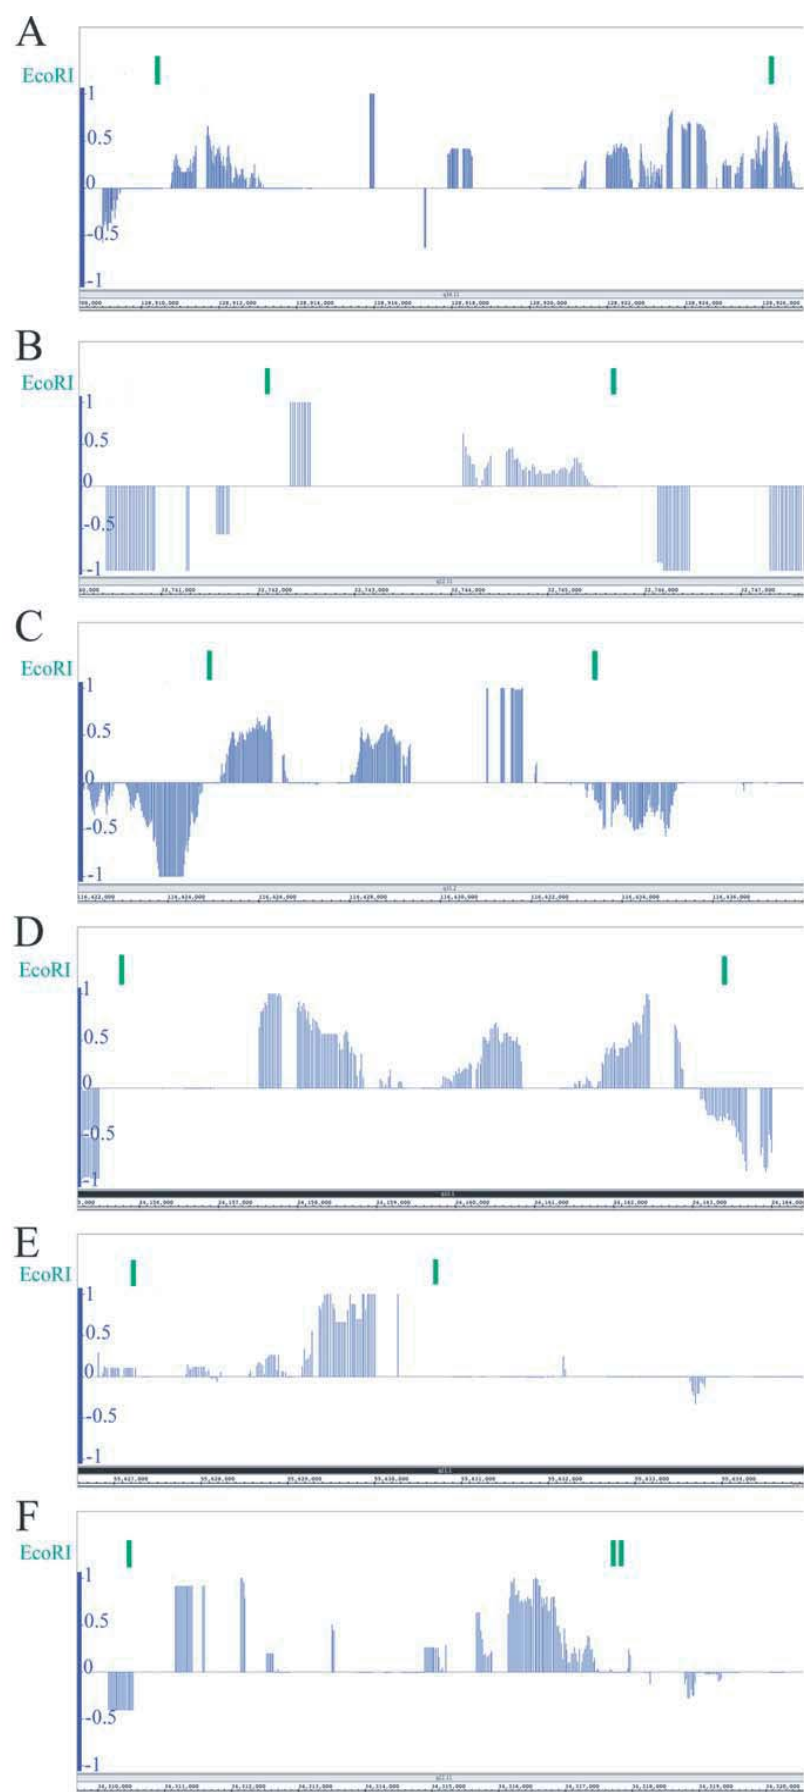

Figure S3

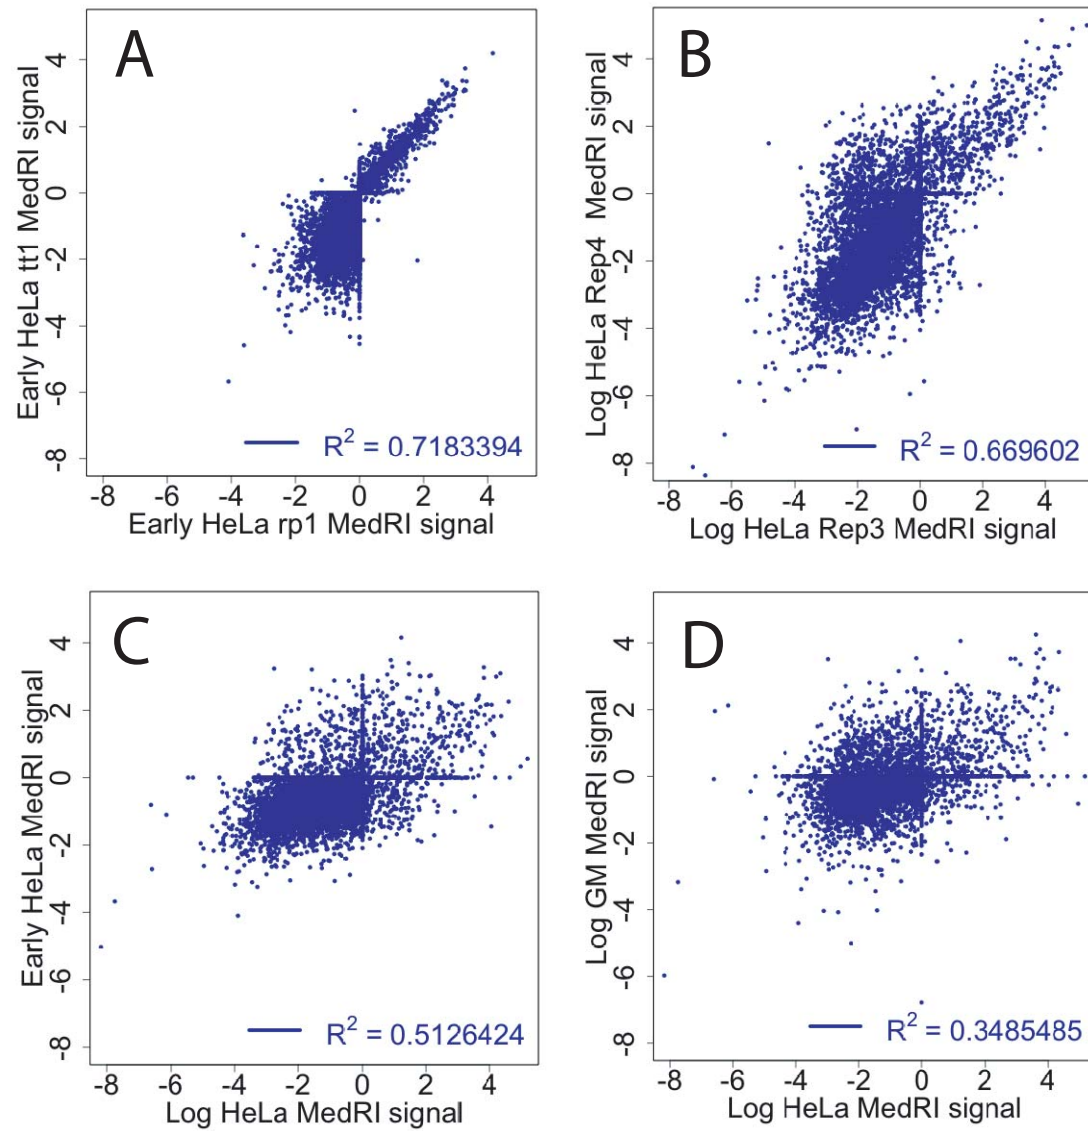

Figure S4

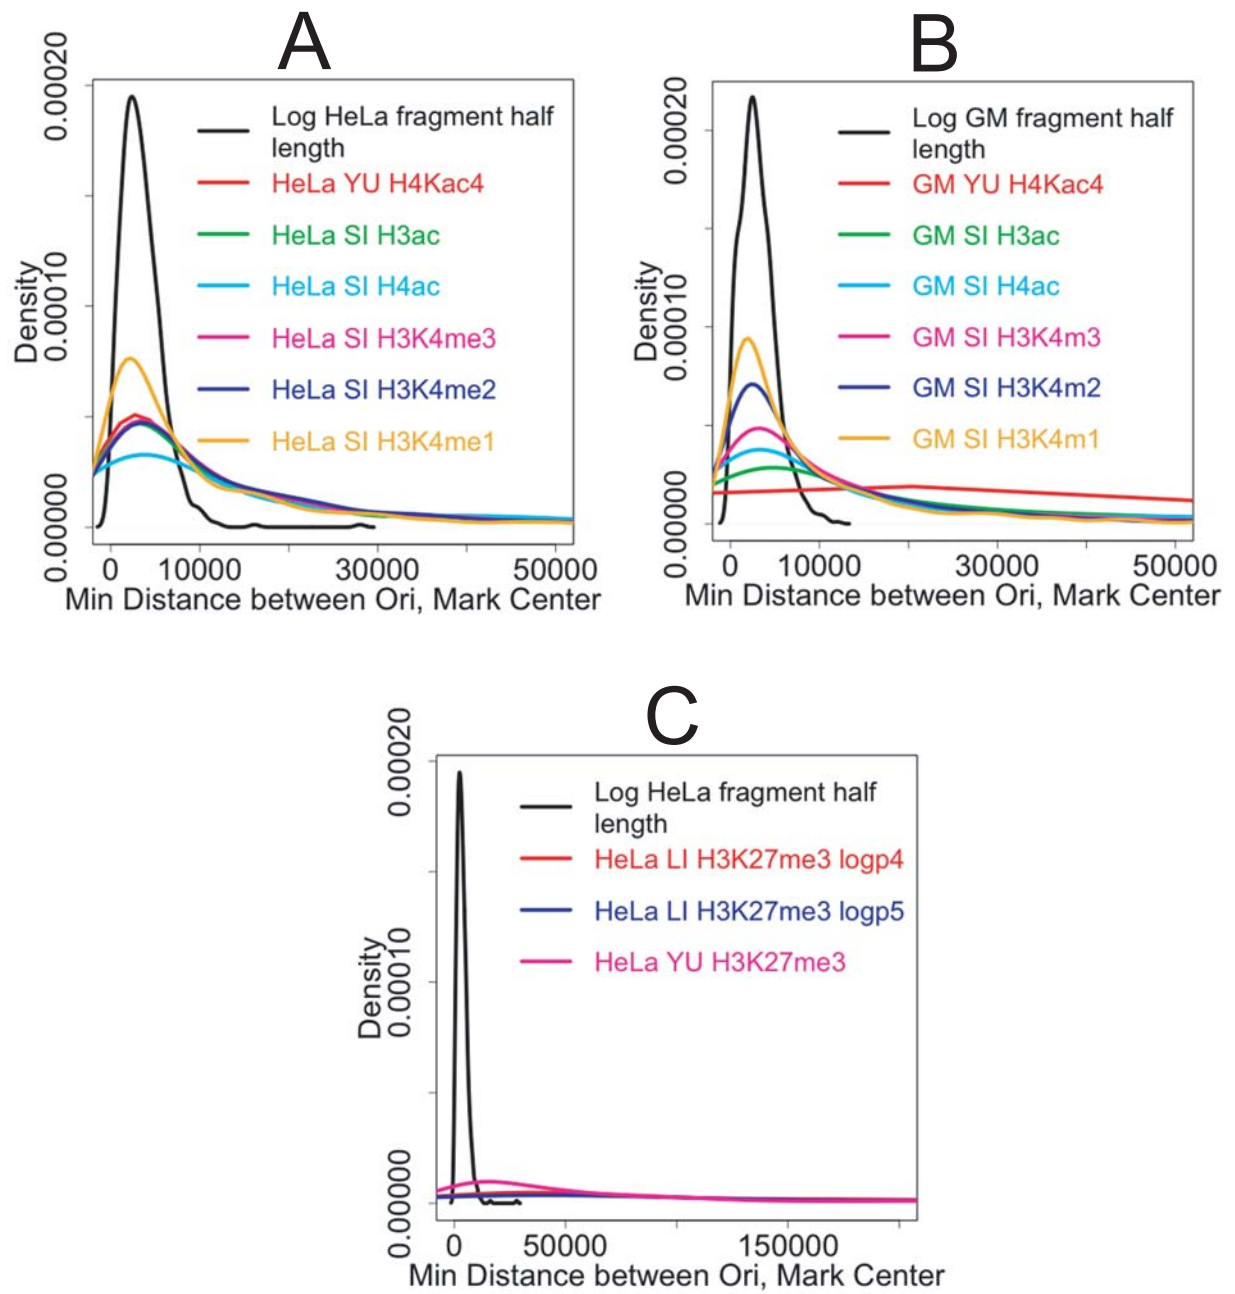

Table SI – Size/strength of overlapping & non-overlapping fragments

A. Early-S-phase HeLa Rp1 and Tt1

|                       | # Signals | % Rp1 | % Tt1 | Mean size | Mean strength |
|-----------------------|-----------|-------|-------|-----------|---------------|
| Rp1 frags             | 626       |       |       |           |               |
| Tt1 frags             | 670       |       |       |           |               |
| Overlaps              | 563       | 89.9% | 84.0% | 6697      | 1.294         |
| Unique to Rp1         | 63        |       |       | 4883      | 0.540         |
| Unique Tt1            | 107       |       |       | 5569      | 0.443         |
| Non-overlapping means |           |       |       | 5315      | 0.479         |

B. Log HeLa Rep3 and Rep4

|                       | # Signals | % Rep3 | % Rep4 | Mean size | Mean strength |
|-----------------------|-----------|--------|--------|-----------|---------------|
| Rep3 frags            | 594       |        |        |           |               |
| Rep4 frags            | 1068      |        |        |           |               |
| Overlaps              | 458       | 77.1%  | 42.9%  | 6981      | 1.788         |
| Unique Rep3           | 136       |        |        | 5560      | 0.747         |
| Unique to Rep4        | 610       |        |        | 6049      | 0.963         |
| Non-overlapping means |           |        |        | 5960      | 0.924         |

C. Early-S-phase and Log-phase HeLa

|                       | # Signals | % Early | % Log | Mean size | Mean strength |
|-----------------------|-----------|---------|-------|-----------|---------------|
| Early frags           | 646       |         |       |           |               |
| Log frags             | 657       |         |       |           |               |
| Overlaps              | 282       | 42.9%   | 43.7% | 7781      | 1.577         |
| Unique Early-S        | 364       |         |       | 6335      | 1.200         |
| Unique to Log         | 375       |         |       | 5630      | 1.057         |
| Non-overlapping means |           |         |       | 5988      | 1.129         |

D. Log-phase HeLa and Log-phase GM06990

|                       | # Signals | % HeLa | % GM  | Mean size | Mean strength |
|-----------------------|-----------|--------|-------|-----------|---------------|
| Log HeLa frags        | 657       |        |       |           |               |
| Log GM frags          | 988       |        |       |           |               |
| Overlaps              | 280       | 42.6%  | 28.3% | 8041      | 1.557         |
| Unique to HeLa        | 377       |        |       | 6150      | 1.241         |
| Unique to GM          | 708       |        |       | 5357      | 0.896         |
| Non-overlapping means |           |        |       | 5633      | 1.016         |



**Table SII – Significance of fragment clustering**

| <b>Early HeLa</b>    | p-value  | # actual | fold-change | mean random | sd random | z     |
|----------------------|----------|----------|-------------|-------------|-----------|-------|
| # of zones           | < 0.0001 | 111      | 1.41        | 78.67       | 6.19      | 5.22  |
| Mean length          | 0.8738   | 15,195   | 0.94        | 16,101      | 787.50    | -1.15 |
| Median length        | 0.5286   | 14,589   | 0.99        | 14,665      | 861.83    | -0.09 |
| Mean # fragments     | 0.0003   | 3.39     | 1.25        | 2.70        | 0.18      | 3.85  |
| Median # fragments   | 0.2926   | 3.00     | 1.30        | 2.31        | 0.45      | 1.52  |
| # isolated fragments | 1.0000   | 380      | 0.82        | 465.35      | 13.32     | -6.41 |
| # zonal fragments    | < 0.0001 | 266      | 1.47        | 180.65      | 13.32     | 6.41  |

| <b>Log HeLa</b>      | p-value  | # actual | fold-change | mean random | sd random | z      |
|----------------------|----------|----------|-------------|-------------|-----------|--------|
| # of zones           | < 0.0001 | 128      | 1.46        | 87.81       | 6.16      | 6.52   |
| Mean length          | 0.0611   | 18,115   | 1.08        | 16,769      | 854.29    | 1.58   |
| Median length        | 0.9192   | 13,626   | 0.91        | 14,933      | 958.20    | -1.36  |
| Mean # fragments     | 0.0003   | 3.95     | 1.46        | 2.70        | 0.18      | 7.06   |
| Median # fragments   | 0.2293   | 3.00     | 1.34        | 2.25        | 0.42      | 1.79   |
| # isolated fragments | 1.0000   | 277      | 0.64        | 436.38      | 13.13     | -12.14 |
| # zonal fragments    | <0.0001  | 380      | 1.72        | 220.62      | 13.13     | 12.14  |

| <b>Log GM06990</b>   | p-value  | # actual | fold-change | mean random | sd random | z     |
|----------------------|----------|----------|-------------|-------------|-----------|-------|
| # of zones           | < 0.0001 | 177      | 1.28        | 138.46      | 7.91      | 4.87  |
| Mean length          | 0.7387   | 14,468   | 0.98        | 14,854      | 608.97    | -0.63 |
| Median length        | 0.4561   | 13,514   | 1.01        | 13,442      | 663.00    | 0.11  |
| Mean # fragments     | < 0.0001 | 3.53     | 1.34        | 2.64        | 0.14      | 6.60  |
| Median # fragments   | 0.0896   | 3.00     | 1.43        | 2.10        | 0.29      | 3.12  |
| # isolated fragments | 1.0000   | 538      | 0.80        | 668.82      | 17.07     | -7.67 |
| # zonal fragments    | < 0.0001 | 450      | 1.41        | 319.18      | 17.07     | 7.67  |

## Table SIII – Significance of origin-gene interactions

| <b>A1. Log HeLa (277 isolated)</b> | p-value | # actual | fold-change | mean random | sd random | z     |
|------------------------------------|---------|----------|-------------|-------------|-----------|-------|
| 1. Fragment in tx gene             | 0.0043  | 60       | 1.32        | 45.64       | 5.02      | 2.86  |
| 2. Tx gene(s) in fragment          | 0.2477  | 4        | 1.55        | 2.58        | 1.44      | 0.99  |
| 3. Frag overlaps 5' tx gene(s)     | 0.1115  | 12       | 1.46        | 8.23        | 2.63      | 1.44  |
| 4. Frag overlaps 3' tx gene(s)     | 0.0291  | 14       | 1.70        | 8.24        | 2.62      | 2.20  |
| 5. Frag in non-tx gene             | 0.8526  | 66       | 0.92        | 71.92       | 6.12      | -0.97 |
| 6. Non-tx gene(s) in frag          | 0.1127  | 8        | 1.62        | 4.93        | 2.07      | 1.48  |
| 7. Frag overlaps 5' non-tx gene(s) | 0.0830  | 17       | 1.42        | 12.00       | 3.19      | 1.57  |
| 8. Frag overlaps 3' non-tx gene(s) | 0.6731  | 9        | 0.91        | 9.90        | 2.92      | -0.31 |
| 9. Intergenic                      | 1.0000  | 87       | 0.77        | 113.57      | 6.70      | -3.97 |
| Total transcribed ori fragments    | 0.0056  | 60       | 1.30        | 46.11       | 5.03      | 2.76  |
| Total free from transcription      | 1.0000  | 188      | 0.89        | 212.53      | 5.62      | -4.37 |
| Total indeterminate fragments      | 0.0048  | 29       | 1.58        | 18.36       | 3.70      | 2.88  |
| Mixed (2, 3, 4) transcribed oris   | 1.0000  | 0        | 0           | 0.46        | 0.67      | -0.69 |
| Mixed (class 2, 3, 4) non-tx       | 0.1914  | 1        | 4.73        | 0.21        | 0.46      | 1.73  |
| Mixed (class 2, 3, 4) indeterm     | 0.0048  | 29       | 1.58        | 18.36       | 3.70      | 2.88  |

| <b>A2. Log GM (538 isolated)</b>   | p-value | # actual | fold-change | mean random | sd random | z     |
|------------------------------------|---------|----------|-------------|-------------|-----------|-------|
| 1. Fragment in tx gene             | 0.4649  | 64       | 1.02        | 63.04       | 6.07      | 0.16  |
| 2. Tx gene(s) in fragment          | 0.9577  | 1        | 0.36        | 2.81        | 1.52      | 1.19  |
| 3. Frag overlaps 5' tx gene(s)     | 0.2103  | 13       | 1.28        | 10.18       | 2.91      | 0.97  |
| 4. Frag overlaps 3' tx gene(s)     | 0.4073  | 11       | 1.11        | 9.92        | 2.89      | 0.37  |
| 5. Frag in non-tx gene             | 0.9974  | 137      | 0.87        | 158.37      | 8.17      | -2.62 |
| 6. Non-tx gene(s) in frag          | 0.6734  | 6        | 0.90        | 6.64        | 2.34      | -0.28 |
| 7. Frag overlaps 5' non-tx gene(s) | 0.0074  | 25       | 1.64        | 15.27       | 3.55      | 2.74  |
| 8. Frag overlaps 3' non-tx gene(s) | 0.0451  | 20       | 1.47        | 13.75       | 3.34      | 1.90  |
| 9. Intergenic                      | 0.3944  | 261      | 1.01        | 258.11      | 8.87      | 0.33  |
| Total transcribed ori fragments    | 0.4508  | 65       | 1.02        | 63.79       | 6.09      | 0.20  |
| Total free from transcription      | 0.7189  | 449      | 0.99        | 452.34      | 6.73      | -0.50 |
| Total indeterminate fragments      | 0.3402  | 24       | 1.10        | 21.87       | 4.07      | 0.53  |
| Mixed (2, 3, 4) transcribed oris   | 0.5316  | 1        | 1.34        | 0.75        | 0.85      | 0.30  |
| Mixed (class 2, 3, 4) non-tx       | 1.0000  | 0        | 0           | 0.2958      | 0.54      | -0.55 |
| Mixed (class 2, 3, 4) indeterm     | 0.3402  | 24       | 1.10        | 21.87       | 4.07      | 0.53  |

| <b>B1. Log HeLa ( 380 zonal frags)</b> | p-value | # actual | fold-change | mean random | sd random | z     |
|----------------------------------------|---------|----------|-------------|-------------|-----------|-------|
| # Category 1 zones                     | 0.0058  | 21       | 1.69        | 12.44       | 3.06      | 2.80  |
| # Category 2 zones                     | <0.0001 | 24       | 4.32        | 5.56        | 1.96      | 9.40  |
| # Category 3 zones                     | <0.0001 | 22       | 2.92        | 7.52        | 2.44      | 5.93  |
| # Category 4 zones                     | 0.0030  | 13       | 2.22        | 5.87        | 2.20      | 3.25  |
| # Category 5 zones                     | 0.6073  | 17       | 0.97        | 17.55       | 3.63      | -0.15 |
| # Category 6 zones                     | 0.1836  | 8        | 1.44        | 5.57        | 2.17      | 1.12  |
| # Category 7 zones                     | 0.1387  | 9        | 1.50        | 5.98        | 2.29      | 1.32  |
| # Category 8 zones                     | 0.9562  | 2        | 0.43        | 4.70        | 2.05      | -1.31 |
| # Category 9 zones                     | 0.9972  | 12       | 0.54        | 22.39       | 4.13      | -2.52 |
| Category 1 zone - # class 1 frags      | 0.0007  | 55       | 1.96        | 27.99       | 7.00      | 3.86  |
| Category 2 zone - # class 1 frags      | <0.0001 | 28       | 7.98        | 3.51        | 2.38      | 10.28 |
| Category 2 zone - # class 2 frags      | 0.1905  | 13       | 1.82        | 7.16        | 5.24      | 1.11  |
| Category 2 zone - # class 3 frags      | <0.0001 | 16       | 8.27        | 1.93        | 1.37      | 10.27 |
| Category 2 zone - # class 4 frags      | <0.0001 | 23       | 3.61        | 6.37        | 4.73      | 3.52  |
| Category 2 zone - # class 5 frags      | 0.0502  | 5        | 4.19        | 1.19        | 1.56      | 2.44  |
| Category 2 zone - # class 6 frags      | <0.0001 | 5        | 23.21       | 0.22        | 0.47      | 10.28 |
| Category 2 zone - # class 7 frags      | 0.0118  | 3        | 6.03        | 0.50        | 0.69      | 3.63  |
| Category 2 zone - # class 8 frags      | 0.0001  | 4        | 15.22       | 0.26        | 0.51      | 7.29  |
| Category 2 zone - # class 9 frags      | <0.0001 | 19       | 5.44        | 3.49        | 2.29      | 6.78  |
| Category 3 zone - # class 1 frags      | 0.0026  | 16       | 2.72        | 5.89        | 2.96      | 3.42  |
| Category 3 zone - # class 3 frags      | <0.0001 | 22       | 3.73        | 5.89        | 2.40      | 6.71  |
| Category 3 zone - # class 4 frags      | 0.0836  | 2        | 3.99        | 0.50        | 0.69      | 2.16  |
| Category 3 zone - # class 5 frags      | 0.3376  | 2        | 1.55        | 1.29        | 1.48      | 0.48  |
| Category 3 zone - # class 6 frags      | 0.0180  | 2        | 10.03       | 0.20        | 0.45      | 4.01  |
| Category 3 zone - # class 7 frags      | 0.4961  | 1        | 1.49        | 0.67        | 0.80      | 0.41  |
| Category 3 zone - # class 8 frags      | 1.0000  | 0        | 0           | 0.49        | 0.69      | -0.70 |
| Category 3 zone - # class 9 frags      | 0.1504  | 7        | 1.76        | 3.97        | 2.46      | 1.23  |
| Category 4 zone - # class 1 frags      | <0.0001 | 18       | 4.57        | 3.94        | 2.28      | 6.18  |
| Category 4 zone - # class 4 frags      | 0.2006  | 14       | 1.67        | 8.37        | 4.97      | 1.13  |
| Category 4 zone - # class 5 frags      | 0.7619  | 1        | 0.45        | 2.20        | 1.94      | -0.62 |
| Category 4 zone - # class 6 frags      | 1.0000  | 0        | 0           | 0.21        | 0.45      | -0.47 |
| Category 4 zone - # class 7 frags      | 0.3569  | 1        | 2.29        | 0.44        | 0.65      | 0.86  |
| Category 4 zone - # class 8 frags      | 0.2279  | 1        | 3.89        | 0.26        | 0.51      | 1.47  |
| Category 4 zone - # class 9 frags      | 0.0569  | 6        | 2.39        | 2.51        | 1.72      | 2.03  |
| Category 5 zone - # class 5 frags      | 0.5273  | 39       | 0.99        | 39.31       | 8.31      | -0.04 |
| Category 6 zone - # class 5 frags      | 0.2439  | 4        | 1.70        | 2.36        | 1.96      | 0.84  |
| Category 6 zone - # class 6 frags      | 0.0469  | 6        | 2.39        | 2.51        | 1.66      | 2.10  |
| Category 6 zone - # class 7 frags      | 0.2265  | 4        | 1.70        | 2.35        | 1.67      | 0.99  |
| Category 6 zone - # class 8 frags      | 0.8001  | 1        | 0.62        | 1.60        | 1.26      | -0.48 |
| Category 6 zone - # class 9 frags      | 0.5827  | 4        | 0.93        | 4.31        | 2.52      | -0.12 |
| Category 7 zone - # class 5 frags      | 0.0435  | 10       | 2.16        | 4.62        | 2.59      | 2.08  |
| Category 7 zone - # class 7 frags      | 0.0746  | 9        | 1.81        | 4.96        | 2.34      | 1.72  |
| Category 7 zone - # class 8 frags      | 1.0000  | 0        | 0           | 0.21        | 0.47      | -0.45 |
| Category 7 zone - # class 9 frags      | 0.1864  | 6        | 1.66        | 3.62        | 2.23      | 1.07  |
| Category 8 zone - # class 5 frags      | 0.7988  | 2        | 0.60        | 3.34        | 2.13      | -0.63 |
| Category 8 zone - # class 8 frags      | 0.8617  | 2        | 0.54        | 3.67        | 2.02      | -0.83 |
| Category 8 zone - # class 9 frags      | 0.6022  | 3        | 0.90        | 3.34        | 2.19      | -0.15 |
| Category 9 zone - # class 9 frags      | 0.9966  | 26       | 0.52        | 49.54       | 9.97      | -2.36 |

|                                      |         |     |       |        |       |        |
|--------------------------------------|---------|-----|-------|--------|-------|--------|
| Mixed (cat 2 /class 2,3,4 – tx       | 0.0387  | 2   | 6.22  | 0.32   | 0.56  | 3.01   |
| Mixed (cat 2 /class 2,3,4 – non-tx   | 1.0000  | 0   | 0     | 0.06   | 0.25  | - 0.24 |
| Mixed (cat 2 /class 3,4 – indetermin | <0.0001 | 50  | 3.32  | 15.08  | 9.96  | 3.51   |
| Mixed (cat 3 /class 3,4 – tx         | 0.1592  | 1   | 5.80  | 0.17   | 0.41  | 2.01   |
| Mixed (cat 3 /class 3,4 – non-tx     | 1.0000  | 0   | 0     | 0.12   | 0.34  | - 0.34 |
| Mixed (cat 3 /class 3,4 – indetermin | <0.0001 | 23  | 3.77  | 6.10   | 2.49  | 6.80   |
| Mixed (cat 4 /class 4 – tx           | 1.0000  | 0   | 0     | 0.14   | 0.37  | - 0.38 |
| Mixed (cat 4 /class 4 – non-tx       | 0.0685  | 1   | 13.99 | 0.07   | 0.27  | 3.44   |
| Mixed (cat 4 /class 4 – indetermin   | 0.2712  | 13  | 1.59  | 8.15   | 4.94  | 0.98   |
| Total # transcribed oris             | <0.0001 | 120 | 2.86  | 41.96  | 7.45  | 10.48  |
| Total # non-transcribed              | 0.0181  | 174 | 1.21  | 143.89 | 13.44 | 2.24   |
| Total # indeterminate                | <0.0001 | 86  | 2.93  | 29.34  | 7.63  | 7.42   |
| # of fragments in category 1 zone    | 0.0007  | 55  | 1.96  | 27.99  | 7.00  | 3.86   |
| # of fragments in category 2 zone    | <0.0001 | 116 | 4.71  | 24.63  | 11.72 | 7.80   |
| # of fragments in category 3 zone    | <0.0001 | 52  | 2.75  | 18.90  | 6.41  | 5.16   |
| # of fragments in category 4 zone    | 0.0013  | 41  | 2.29  | 17.92  | 7.36  | 3.14   |
| # of fragments in category 5 zone    | 0.5273  | 39  | 0.99  | 39.31  | 8.31  | - 0.04 |
| # of fragments in category 6 zone    | 0.1567  | 19  | 1.45  | 13.13  | 5.43  | 1.08   |
| # of fragments in category 7 zone    | 0.0294  | 25  | 1.86  | 13.42  | 5.39  | 2.15   |
| # of fragments in category 8 zone    | 0.7705  | 7   | 0.68  | 10.35  | 4.79  | - 0.70 |
| # of fragments in category 9 zone    | 0.9966  | 26  | 0.52  | 49.54  | 9.97  | - 2.36 |

| <b>B2. Log GM ( 450 zonal frags)</b> | p-value | #<br>Actual | fold-<br>change | mean<br>random | sd<br>random | z      |
|--------------------------------------|---------|-------------|-----------------|----------------|--------------|--------|
| # Category 1 zones                   | 0.5605  | 12          | 0.99            | 12.11          | 3.17         | - 0.04 |
| # Category 2 zones                   | 0.0002  | 12          | 2.59            | 4.64           | 1.84         | 4.00   |
| # Category 3 zones                   | <0.0001 | 23          | 3.55            | 6.48           | 2.37         | 6.98   |
| # Category 4 zones                   | 0.0616  | 9           | 1.78            | 5.04           | 2.12         | 1.87   |
| # Category 5 zones                   | 0.1323  | 42          | 1.17            | 35.97          | 4.96         | 1.22   |
| # Category 6 zones                   | 0.7394  | 4           | 0.82            | 4.90           | 2.07         | - 0.44 |
| # Category 7 zones                   | 0.4621  | 7           | 1.10            | 6.38           | 2.42         | 0.26   |
| # Category 8 zones                   | 0.6861  | 5           | 0.87            | 5.71           | 2.28         | -0.31  |
| # Category 9 zones                   | 0.1702  | 63          | 1.11            | 56.84          | 5.93         | 1.04   |
| Category 1 zone - # class 1 frags    | 0.4158  | 28          | 1.07            | 26.25          | 7.04         | 0.25   |
| Category 2 zone - # class 1 frags    | 0.0016  | 11          | 3.95            | 2.78           | 2.12         | 3.88   |
| Category 2 zone - # class 2 frags    | 0.3443  | 7           | 1.68            | 4.16           | 3.27         | 0.87   |
| Category 2 zone - # class 3 frags    | 0.0317  | 5           | 2.96            | 1.69           | 1.34         | 2.48   |
| Category 2 zone - # class 4 frags    | 0.0948  | 7           | 2.10            | 3.34           | 2.37         | 1.54   |
| Category 2 zone - # class 5 frags    | 1.0000  | 0           | 0               | 0.69           | 1.16         | -0.60  |
| Category 2 zone - # class 6 frags    | 1.0000  | 0           | 0               | 0.10           | 0.32         | -0.32  |
| Category 2 zone - # class 7 frags    | 0.2806  | 1           | 3.05            | 0.33           | 0.57         | 1.18   |
| Category 2 zone - # class 8 frags    | 0.2052  | 1           | 4.32            | 0.23           | 0.48         | 1.59   |
| Category 2 zone - # class 9 frags    | 0.4915  | 4           | 1.12            | 3.56           | 2.33         | 0.19   |
| Category 3 zone - # class 1 frags    | 0.0039  | 13          | 3.05            | 4.26           | 2.42         | 3.60   |
| Category 3 zone - # class 3 frags    | <0.0001 | 23          | 5.14            | 4.48           | 2.38         | 7.77   |
| Category 3 zone - # class 4 frags    | 0.0341  | 2           | 6.56            | 0.30           | 0.55         | 3.06   |
| Category 3 zone - # class 5 frags    | 0.0950  | 4           | 3.22            | 1.24           | 1.67         | 1.66   |
| Category 3 zone - # class 6 frags    | 0.0004  | 3           | 22.29           | 0.13           | 0.36         | 7.87   |
| Category 3 zone - # class 7 frags    | 0.0811  | 2           | 4.27            | 0.47           | 0.68         | 2.25   |
| Category 3 zone - # class 8 frags    | 0.3699  | 1           | 2.20            | 0.46           | 0.67         | 0.82   |
| Category 3 zone - # class 9 frags    | 0.0009  | 15          | 4.06            | 3.69           | 2.41         | 4.70   |
| Category 4 zone - # class 1 frags    | 0.0371  | 8           | 2.48            | 3.22           | 2.10         | 2.28   |
| Category 4 zone - # class 4 frags    | 0.0206  | 11          | 2.47            | 4.45           | 2.73         | 2.40   |
| Category 4 zone - # class 5 frags    | 0.6357  | 1           | 0.72            | 1.39           | 1.52         | -0.26  |
| Category 4 zone - # class 6 frags    | 0.1117  | 1           | 8.48            | 0.12           | 0.34         | 2.58   |
| Category 4 zone - # class 7 frags    | 1.0000  | 0           | 0               | 0.41           | 0.65         | -0.63  |
| Category 4 zone - # class 8 frags    | 1.0000  | 0           | 0               | 0.27           | 0.51         | -0.52  |
| Category 4 zone - # class 9 frags    | 0.3774  | 4           | 1.33            | 3.02           | 2.28         | 0.43   |
| Category 5 zone - # class 5 frags    | 0.0157  | 105         | 1.33            | 79.96          | 11.07        | 2.26   |
| Category 6 zone - # class 5 frags    | 0.7502  | 1           | 0.54            | 1.85           | 1.73         | -0.49  |
| Category 6 zone - # class 6 frags    | 0.3501  | 3           | 1.45            | 2.07           | 1.53         | 0.61   |
| Category 6 zone - # class 7 frags    | 0.8061  | 1           | 0.54            | 1.85           | 1.49         | -0.57  |
| Category 6 zone - # class 8 frags    | 0.7274  | 1           | 0.76            | 1.31           | 1.15         | -0.27  |
| Category 6 zone - # class 9 frags    | 0.2519  | 6           | 1.48            | 4.06           | 2.39         | 0.81   |
| Category 7 zone - # class 5 frags    | 0.6107  | 4           | 0.90            | 4.46           | 2.54         | -0.18  |
| Category 7 zone - # class 7 frags    | 0.2374  | 7           | 1.46            | 4.78           | 2.46         | 0.90   |
| Category 7 zone - # class 8 frags    | 1.0000  | 0           | 0               | 0.30           | 0.55         | -0.55  |
| Category 7 zone - # class 9 frags    | 0.5559  | 4           | 0.96            | 4.18           | 2.47         | -0.07  |
| Category 8 zone - # class 5 frags    | 0.5048  | 4           | 1.05            | 3.81           | 2.29         | 0.08   |
| Category 8 zone - # class 8 frags    | 0.4209  | 5           | 1.20            | 4.18           | 2.28         | 0.36   |
| Category 8 zone - # class 9 frags    | 0.9648  | 1           | 0.24            | 4.19           | 2.45         | -1.30  |
| Category 9 zone - # class 9 frags    | 0.0306  | 156         | 1.22            | 127.93         | 14.06        | 2.00   |

|                                      |         |     |       |        |       |       |
|--------------------------------------|---------|-----|-------|--------|-------|-------|
| Mixed (cat 2 /class 2,3,4 – tx       | 0.2702  | 1   | 3.26  | 0.31   | 0.54  | 1.28  |
| Mixed (cat 2 /class 2,3,4 – non-tx   | 0.0503  | 1   | 19.42 | 0.05   | 0.23  | 4.19  |
| Mixed (cat 2 /class 3,4 – indetermin | 0.0888  | 17  | 1.93  | 8.83   | 5.65  | 1.45  |
| Mixed (cat 3 /class 3,4 – tx         | 0.1099  | 1   | 8.70  | 0.11   | 0.33  | 2.65  |
| Mixed (cat 3 /class 3,4 – non-tx     | 0.0793  | 1   | 12.03 | 0.08   | 0.29  | 3.16  |
| Mixed (cat 3 /class 3,4 – indetermin | <0.0001 | 23  | 5.02  | 4.58   | 2.42  | 7.61  |
| Mixed (cat 4 /class 4 – tx           | 1.0000  | 0   | 0     | 0.16   | 0.39  | -0.39 |
| Mixed (cat 4 /class 4 – non-tx       | 1.0000  | 0   | 0     | 0.06   | 0.24  | -0.24 |
| Mixed (cat 4 /class 4 – indetermin   | 0.0143  | 11  | 2.60  | 4.24   | 2.67  | 2.53  |
| Total # transcribed oris             | 0.0017  | 62  | 1.67  | 37.09  | 7.83  | 3.18  |
| Total # non-transcribed              | <0.0001 | 337 | 1.29  | 261.22 | 17.09 | 4.43  |
| Total # indeterminate                | <0.0001 | 51  | 2.89  | 17.65  | 6.35  | 5.25  |
| # of fragments in category 1 zone    | 0.4158  | 28  | 1.07  | 26.25  | 7.04  | 0.25  |
| # of fragments in category 2 zone    | 0.0073  | 36  | 2.13  | 16.88  | 8.12  | 2.35  |
| # of fragments in category 3 zone    | <0.0001 | 63  | 4.19  | 15.03  | 5.67  | 8.46  |
| # of fragments in category 4 zone    | 0.0311  | 25  | 1.94  | 12.87  | 5.80  | 2.09  |
| # of fragments in category 5 zone    | 0.0157  | 105 | 1.31  | 79.97  | 11.07 | 2.26  |
| # of fragments in category 6 zone    | 0.4384  | 12  | 1.08  | 11.12  | 4.94  | 0.18  |
| # of fragments in category 7 zone    | 0.4196  | 15  | 1.09  | 13.72  | 5.46  | 0.23  |
| # of fragments in category 8 zone    | 0.6773  | 10  | 0.82  | 12.18  | 5.19  | -0.42 |

| <b>C1. Log HeLa (128 zones)</b>    | p-value | # actual | fold-change | mean random | sd random | z     |
|------------------------------------|---------|----------|-------------|-------------|-----------|-------|
| 1. Fragment in tx gene             | 0.3730  | 21       | 1.08        | 19.47       | 3.29      | 0.47  |
| 2. Tx gene(s) in fragment          | <0.0001 | 24       | 3.50        | 6.86        | 2.13      | 8.06  |
| 3. Frag overlaps 5' tx gene(s)     | 0.0001  | 22       | 2.65        | 8.31        | 2.54      | 5.39  |
| 4. Frag overlaps 3' tx gene(s)     | 0.0204  | 13       | 1.80        | 7.24        | 2.41      | 2.39  |
| 5. Frag in non-tx gene             | 0.9952  | 17       | 0.65        | 26.06       | 3.79      | -2.40 |
| 6. Non-tx gene(s) in frag          | 0.5155  | 8        | 1.04        | 7.68        | 2.38      | 0.13  |
| 7. Frag overlaps 5' non-tx gene(s) | 0.4366  | 9        | 1.10        | 8.19        | 2.63      | 0.31  |
| 8. Frag overlaps 3' non-tx gene(s) | 0.9805  | 2        | 0.37        | 5.48        | 2.19      | -1.59 |
| 9. Intergenic                      | 1.0000  | 12       | 0.31        | 38.70       | 4.18      | -6.39 |
| Total transcribed ori fragments    | 0.4185  | 21       | 1.06        | 19.83       | 3.31      | 0.35  |
| Total free from transcription      | 1.0000  | 48       | 0.56        | 86.22       | 4.15      | -9.22 |
| Total indeterminate fragments      | <0.0001 | 59       | 2.69        | 21.94       | 3.49      | 10.61 |
| Mixed (2, 3, 4) transcribed oris   | 1.0000  | 0        | 0           | 0.36        | 0.59      | -0.62 |
| Mixed (class 2, 3, 4) non-tx       | 1.0000  | 0        | 0           | 0.11        | 0.32      | -0.33 |
| Mixed (class 2, 3, 4) indeterm     | <0.0001 | 59       | 2.69        | 21.94       | 3.49      | 10.61 |

| <b>C2. Log GM (177 zones)</b>    | p-value | # actual | fold-change | mean random | sd random | z      |
|----------------------------------|---------|----------|-------------|-------------|-----------|--------|
| 1. Fragment in tx gene           | 1.0000  | 12       | 0.19        | 63.04       | 6.07      | -8.41  |
| 2. Tx gene(s) in fragment        | <0.0001 | 12       | 4.27        | 2.81        | 1.52      | 6.06   |
| 3. Frag overlaps 5' tx gene(s)   | <0.0001 | 23       | 2.26        | 10.18       | 2.91      | 4.40   |
| 4. Frag overlaps 3' tx gene(s)   | 0.6808  | 9        | 0.91        | 9.92        | 2.89      | -0.32  |
| 5. Frag in non-tx gene           | 1.0000  | 42       | 0.27        | 158.37      | 8.17      | 14.24  |
| 6. Non-tx gene(s) in frag        | 0.9194  | 4        | 0.61        | 6.64        | 2.34      | -1.13  |
| 7. Frag overlaps 5' non-tx gene  | 0.9956  | 7        | 0.46        | 15.27       | 3.55      | -2.33  |
| 8. Frag overlaps 3' non-tx gene  | 0.9985  | 5        | 0.37        | 13.65       | 3.34      | -2.59  |
| 9. Intergenic                    | 1.0000  | 63       | 0.24        | 258.11      | 8.87      | -22.00 |
| Total transcribed ori fragments  | 1.0000  | 13       | 0.21        | 63.79       | 6.09      | -8.34  |
| Total free from transcription    | 1.0000  | 121      | 0.27        | 452.34      | 6.73      | -49.21 |
| Total indeterminate fragments    | 0.0001  | 43       | 1.97        | 21.87       | 4.07      | 5.20   |
| Mixed (2, 3, 4) transcribed oris | 0.5316  | 1        | 1.34        | 0.75        | 0.85      | 0.30   |
| Mixed (class 2, 3, 4) non-tx     | 1.0000  | 0        | 0           | 0.30        | 0.54      | -0.55  |
| Mixed (class 2, 3, 4) indeterm   | 0.0001  | 43       | 1.97        | 21.87       | 4.07      | 5.20   |



Table SIV - Fixed Isolated & Zones – Randomization for histone marks (10k iterations)

| A. Log HeLa (277 isolated) |                                                 | p-value  | # actual | fold-change | mean random | sd random | z                 |
|----------------------------|-------------------------------------------------|----------|----------|-------------|-------------|-----------|-------------------|
| 1                          | +2 kb TSS – Hp <sup>*</sup> /Tx                 | < 0.0001 | 87       | 1.43        | 60.95       | 5.42      | 4.81              |
| 2                          | +2 kb TSS - Hp <sup>o</sup> /Tx                 | 0.7948   | 3        | 0.80        | 3.74        | 1.48      | -0.50             |
| 3                          | +2 kb TSS - Hp <sup>*</sup> /non-Tx             | 0.0065   | 80       | 1.24        | 64.76       | 5.99      | 2.54              |
| 4                          | +2 kb TSS - Hp <sup>o</sup> /non-Tx             | 0.9999   | 20       | 0.59        | 33.98       | 4.35      | -3.21             |
| 5                          | 5' - H <sup>*</sup>                             | 0.6542   | 6        | 0.91        | 6.57        | 2.42      | -0.23             |
| 6                          | 5' - H <sup>o</sup>                             | 1.0000   | 0        | 0           | 1.04        | 0.99      | -1.05             |
| 7                          | 3' - H <sup>*</sup>                             | 0.1126   | 2        | 3.44        | 0.58        | 0.75      | 1.90              |
| 8                          | 3' - H <sup>o</sup>                             | 1.0000   | 0        | 0           | 0.18        | 0.42      | -0.43             |
| 9                          | Intergenic - H <sup>*</sup>                     | 0.2398   | 56       | 1.09        | 51.58       | 5.54      | 0.80              |
| 10                         | Intergenic - H <sup>o</sup>                     | 1.0000   | 23       | 0.43        | 53.62       | 5.40      | -5.67             |
|                            |                                                 |          |          |             |             |           | 100%              |
| 11                         | In gene – H <sup>o</sup>                        | 0.6194   | 50       | 0.97        | 51.33       | 5.62      | -0.24             |
| 12                         | In gene – H <sup>*</sup> but no Hp <sup>*</sup> | 0.8282   | 13       | 0.83        | 15.74       | 3.38      | -0.81             |
| 13                         | In gene – H <sup>*</sup> and Hp <sup>*</sup>    | 0.0001   | 127      | 1.32        | 96.36       | 6.65      | 4.61              |
|                            |                                                 |          |          |             |             |           | 100% of "In gene" |
| 14                         | In gene - H <sup>*</sup> and non-Tx             | 0.0364   | 75       | 1.18        | 63.39       | 6.06      | 1.92              |

| B. Log HeLa (128 zones) |                                                 | p-value  | # actual | fold-change | mean random | sd random | z                 |
|-------------------------|-------------------------------------------------|----------|----------|-------------|-------------|-----------|-------------------|
| 1                       | +2 kb TSS – Hp <sup>*</sup> /Tx                 | < 0.0001 | 75       | 1.87        | 40.17       | 4.03      | 8.64              |
| 2                       | +2 kb TSS - Hp <sup>o</sup> /Tx                 | 0.0062   | 5        | 2.92        | 1.71        | 1.04      | 3.16              |
| 3                       | +2 kb TSS - Hp <sup>*</sup> /non-Tx             | 0.7376   | 32       | 0.93        | 34.28       | 4.31      | -0.53             |
| 4                       | +2 kb TSS - Hp <sup>o</sup> /non-Tx             | 1.0000   | 4        | 0.30        | 13.14       | 2.90      | -3.15             |
| 5                       | 5' - H <sup>*</sup>                             | 1.0000   | 0        | 0           | 3.06        | 1.69      | -1.82             |
| 6                       | 5' - H <sup>o</sup>                             | 1.0000   | 0        | 0           | 0.50        | 0.69      | -0.73             |
| 7                       | 3' - H <sup>*</sup>                             | 1.0000   | 0        | 0           | 0.32        | 0.57      | -0.57             |
| 8                       | 3' - H <sup>o</sup>                             | 1.0000   | 0        | 0           | 0.13        | 0.35      | -0.36             |
| 9                       | Intergenic - H <sup>*</sup>                     | 0.9994   | 10       | 0.48        | 20.91       | 3.53      | -3.09             |
| 10                      | Intergenic - H <sup>o</sup>                     | 1.0000   | 2        | 0.15        | 13.77       | 3.08      | -3.82             |
|                         |                                                 |          |          |             |             |           | 100%              |
| 11                      | In gene – H <sup>o</sup>                        | 0.9894   | 8        | 0.55        | 14.54       | 3.24      | -2.02             |
| 12                      | In gene – H <sup>*</sup> but no Hp <sup>*</sup> | 0.9824   | 4        | 0.48        | 8.32        | 2.49      | -1.73             |
| 13                      | In gene – H <sup>*</sup> and Hp <sup>*</sup>    | < 0.0001 | 104      | 1.57        | 66.44       | 4.57      | 8.22              |
|                         |                                                 |          |          |             |             |           | 100% of "In gene" |
| 14                      | In gene - H <sup>*</sup> and non-Tx             | 0.9209   | 31       | 0.84        | 36.73       | 4.43      | -1.30             |



| <b>C. Log GM (538 isolated)</b> |                                     | p-value | # actual | fold-change | mean random | sd random | z                 |
|---------------------------------|-------------------------------------|---------|----------|-------------|-------------|-----------|-------------------|
| 1                               | +2 kb TSS - Hp*/Tx                  | 0.1852  | 83       | 1.08        | 76.67       | 6.58      | 0.96              |
| 2                               | +2 kb TSS - Hp <sup>o</sup> /Tx     | 0.9680  | 6        | 0.65        | 9.28        | 2.10      | -1.57             |
| 3                               | +2 kb TSS - Hp*/non-Tx              | 0.4398  | 154      | 1.01        | 152.30      | 8.37      | 0.20              |
| 4                               | +2 kb TSS - Hp <sup>o</sup> /non-Tx | 0.9593  | 34       | 0.82        | 41.64       | 4.69      | -1.63             |
| 5                               | 5' - H*                             | 0.7221  | 12       | 0.88        | 13.61       | 3.45      | -0.47             |
| 6                               | 5' - H <sup>o</sup>                 | 0.1894  | 3        | 1.97        | 1.52        | 1.18      | 1.25              |
| 7                               | 3' - H*                             | 0.1371  | 4        | 1.98        | 2.02        | 1.34      | 1.47              |
| 8                               | 3' - H <sup>o</sup>                 | 1.0000  | 0        | 0           | 0.68        | 0.79      | -0.86             |
| 9                               | Intergenic - H*                     | 0.0343  | 163      | 1.11        | 147.35      | 8.39      | 1.87              |
| 10                              | Intergenic - H <sup>o</sup>         | 0.9792  | 79       | 0.85        | 92.93       | 7.22      | -1.93             |
|                                 |                                     |         |          |             |             |           | 100%              |
| 11                              | In gene – H <sup>o</sup>            | 0.9994  | 47       | 0.68        | 69.35       | 6.63      | -3.37             |
| 12                              | In gene – H* but no Hp*             | 0.8776  | 25       | 0.85        | 29.30       | 4.14      | -1.04             |
| 13                              | In gene – H* and Hp*                | 0.0060  | 205      | 1.13        | 181.25      | 8.99      | 2.64              |
|                                 |                                     |         |          |             |             |           | 100% of "In gene" |
| 14                              | In gene – H* & non-Tx               | 0.0596  | 149      | 1.10        | 135.52      | 8.30      | 1.62              |

| <b>D. Log GM (177 zones)</b> |                                     | p-value | # actual | fold-change | mean random | sd random | z                 |
|------------------------------|-------------------------------------|---------|----------|-------------|-------------|-----------|-------------------|
| 1                            | +2 kb TSS - Hp*/Tx                  | <0.0001 | 55       | 1.71        | 32.13       | 4.19      | 5.45              |
| 2                            | +2 kb TSS - Hp <sup>o</sup> /Tx     | 0.9105  | 1        | 0.54        | 1.86        | 1.07      | -0.80             |
| 3                            | +2 kb TSS - Hp*/non-Tx              | 0.8428  | 49       | 0.91        | 53.78       | 5.19      | -0.92             |
| 4                            | +2 kb TSS - Hp <sup>o</sup> /non-Tx | 0.9930  | 9        | 0.58        | 15.59       | 3.07      | -2.15             |
| 5                            | 5' - H*                             | 0.3870  | 5        | 1.23        | 4.08        | 1.92      | 0.48              |
| 6                            | 5' - H <sup>o</sup>                 | 1.0000  | 0        | 0           | 0.43        | 0.63      | -0.67             |
| 7                            | 3' - H*                             | 0.4004  | 1        | 1.97        | 0.51        | 0.70      | 0.70              |
| 8                            | 3' - H <sup>o</sup>                 | 1.0000  | 0        | 0           | 0.09        | 0.29      | -0.30             |
| 9                            | Intergenic - H*                     | 0.9565  | 40       | 0.84        | 47.80       | 4.89      | -1.59             |
| 10                           | Intergenic - H <sup>o</sup>         | 0.8715  | 17       | 0.82        | 20.75       | 3.79      | -0.99             |
|                              |                                     |         |          |             |             |           | 100%              |
| 11                           | In gene – H <sup>o</sup>            | 1.0000  | 3        | 0.16        | 18.28       | 3.73      | -4.10             |
| 12                           | In gene – H* but no Hp*             | 0.7783  | 9        | 0.85        | 10.56       | 2.65      | -0.59             |
| 13                           | In gene – H* and Hp*                | <0.0001 | 102      | 1.37        | 74.51       | 5.41      | 5.08              |
|                              |                                     |         |          |             |             |           | 100% of "In gene" |
| 14                           | In gene – H* & non-TX               | 0.3903  | 56       | 1.04        | 54.03       | 5.31      | 0.37              |

**Table SV – Locations of overlapping HeLa bubbles, NS (Prioleau), & NS (Dutta)**

| SIGNAL |                     | GENE(S)   |       |                     |        | REMARKS                                    |
|--------|---------------------|-----------|-------|---------------------|--------|--------------------------------------------|
| Chr    | Co-ordinates        | Name      | Chr   | Co-ordinates        | Strand |                                            |
| ChrX   | 122820116-122823175 | BX640970  | ChrX  | 122820089-122960880 | +      | Ori fragment entirely within a tx gene     |
| Chr7   | 115755434-115765854 | AF172085  | Chr7  | 115760357-115793619 | +      | Ori fragment overlaps 5' of tx gene(s)     |
|        |                     | NM_001753 | Chr7  | 115758789-115795181 | +      |                                            |
| Chr7   | 116093377-116102261 | NM_006136 | Chr7  | 116096513-116153263 | +      | Ori fragment overlaps 5' of tx gene(s)     |
| Chr7   | 116169990-116190930 | AF234882  | Chr7  | 116187345-116464022 | +      | Ori fragment overlaps 5' of tx gene(s)     |
|        |                     | BC030954  | Chr7  | 116187505-116464024 | +      |                                            |
|        |                     | NM_018412 | Chr7  | 116187331-116464024 | +      |                                            |
| ChrX   | 152882465-152892047 | BX538060  | ChrX  | 152884024-152816531 | -      | Ori fragment overlaps 5' of tx gene(s)     |
|        |                     | NM_004992 | ChrX  | 152883976-152808110 | -      |                                            |
| Chr15  | 41846946-41851763   | NM_005313 | Chr15 | 41825940-41851036   | +      | Ori fragment overlaps 3' of tx gene(s)     |
| Chr7   | 26922870-26927164   | NM_153631 | Chr7  | 26939879-26919048   | -      | Ori fragment entirely within a non tx gene |
| Chr7   | 26927170-26938946   | NM_153631 | Chr7  | 26939879-26919048   | -      | Ori fragment entirely within a non tx gene |
| Chr6   | 41540995-41548454   |           |       |                     |        | Intergenic                                 |
| ChrX   | 153131198-153139274 |           |       |                     |        | Intergenic                                 |
